# Supplementary material
Source: Springer Nature journal article supplement (https://www.springermedizin.de/resource/supplementary/13256_2011_1802_MOESM1_ESM.pdf/9648474)

(A)

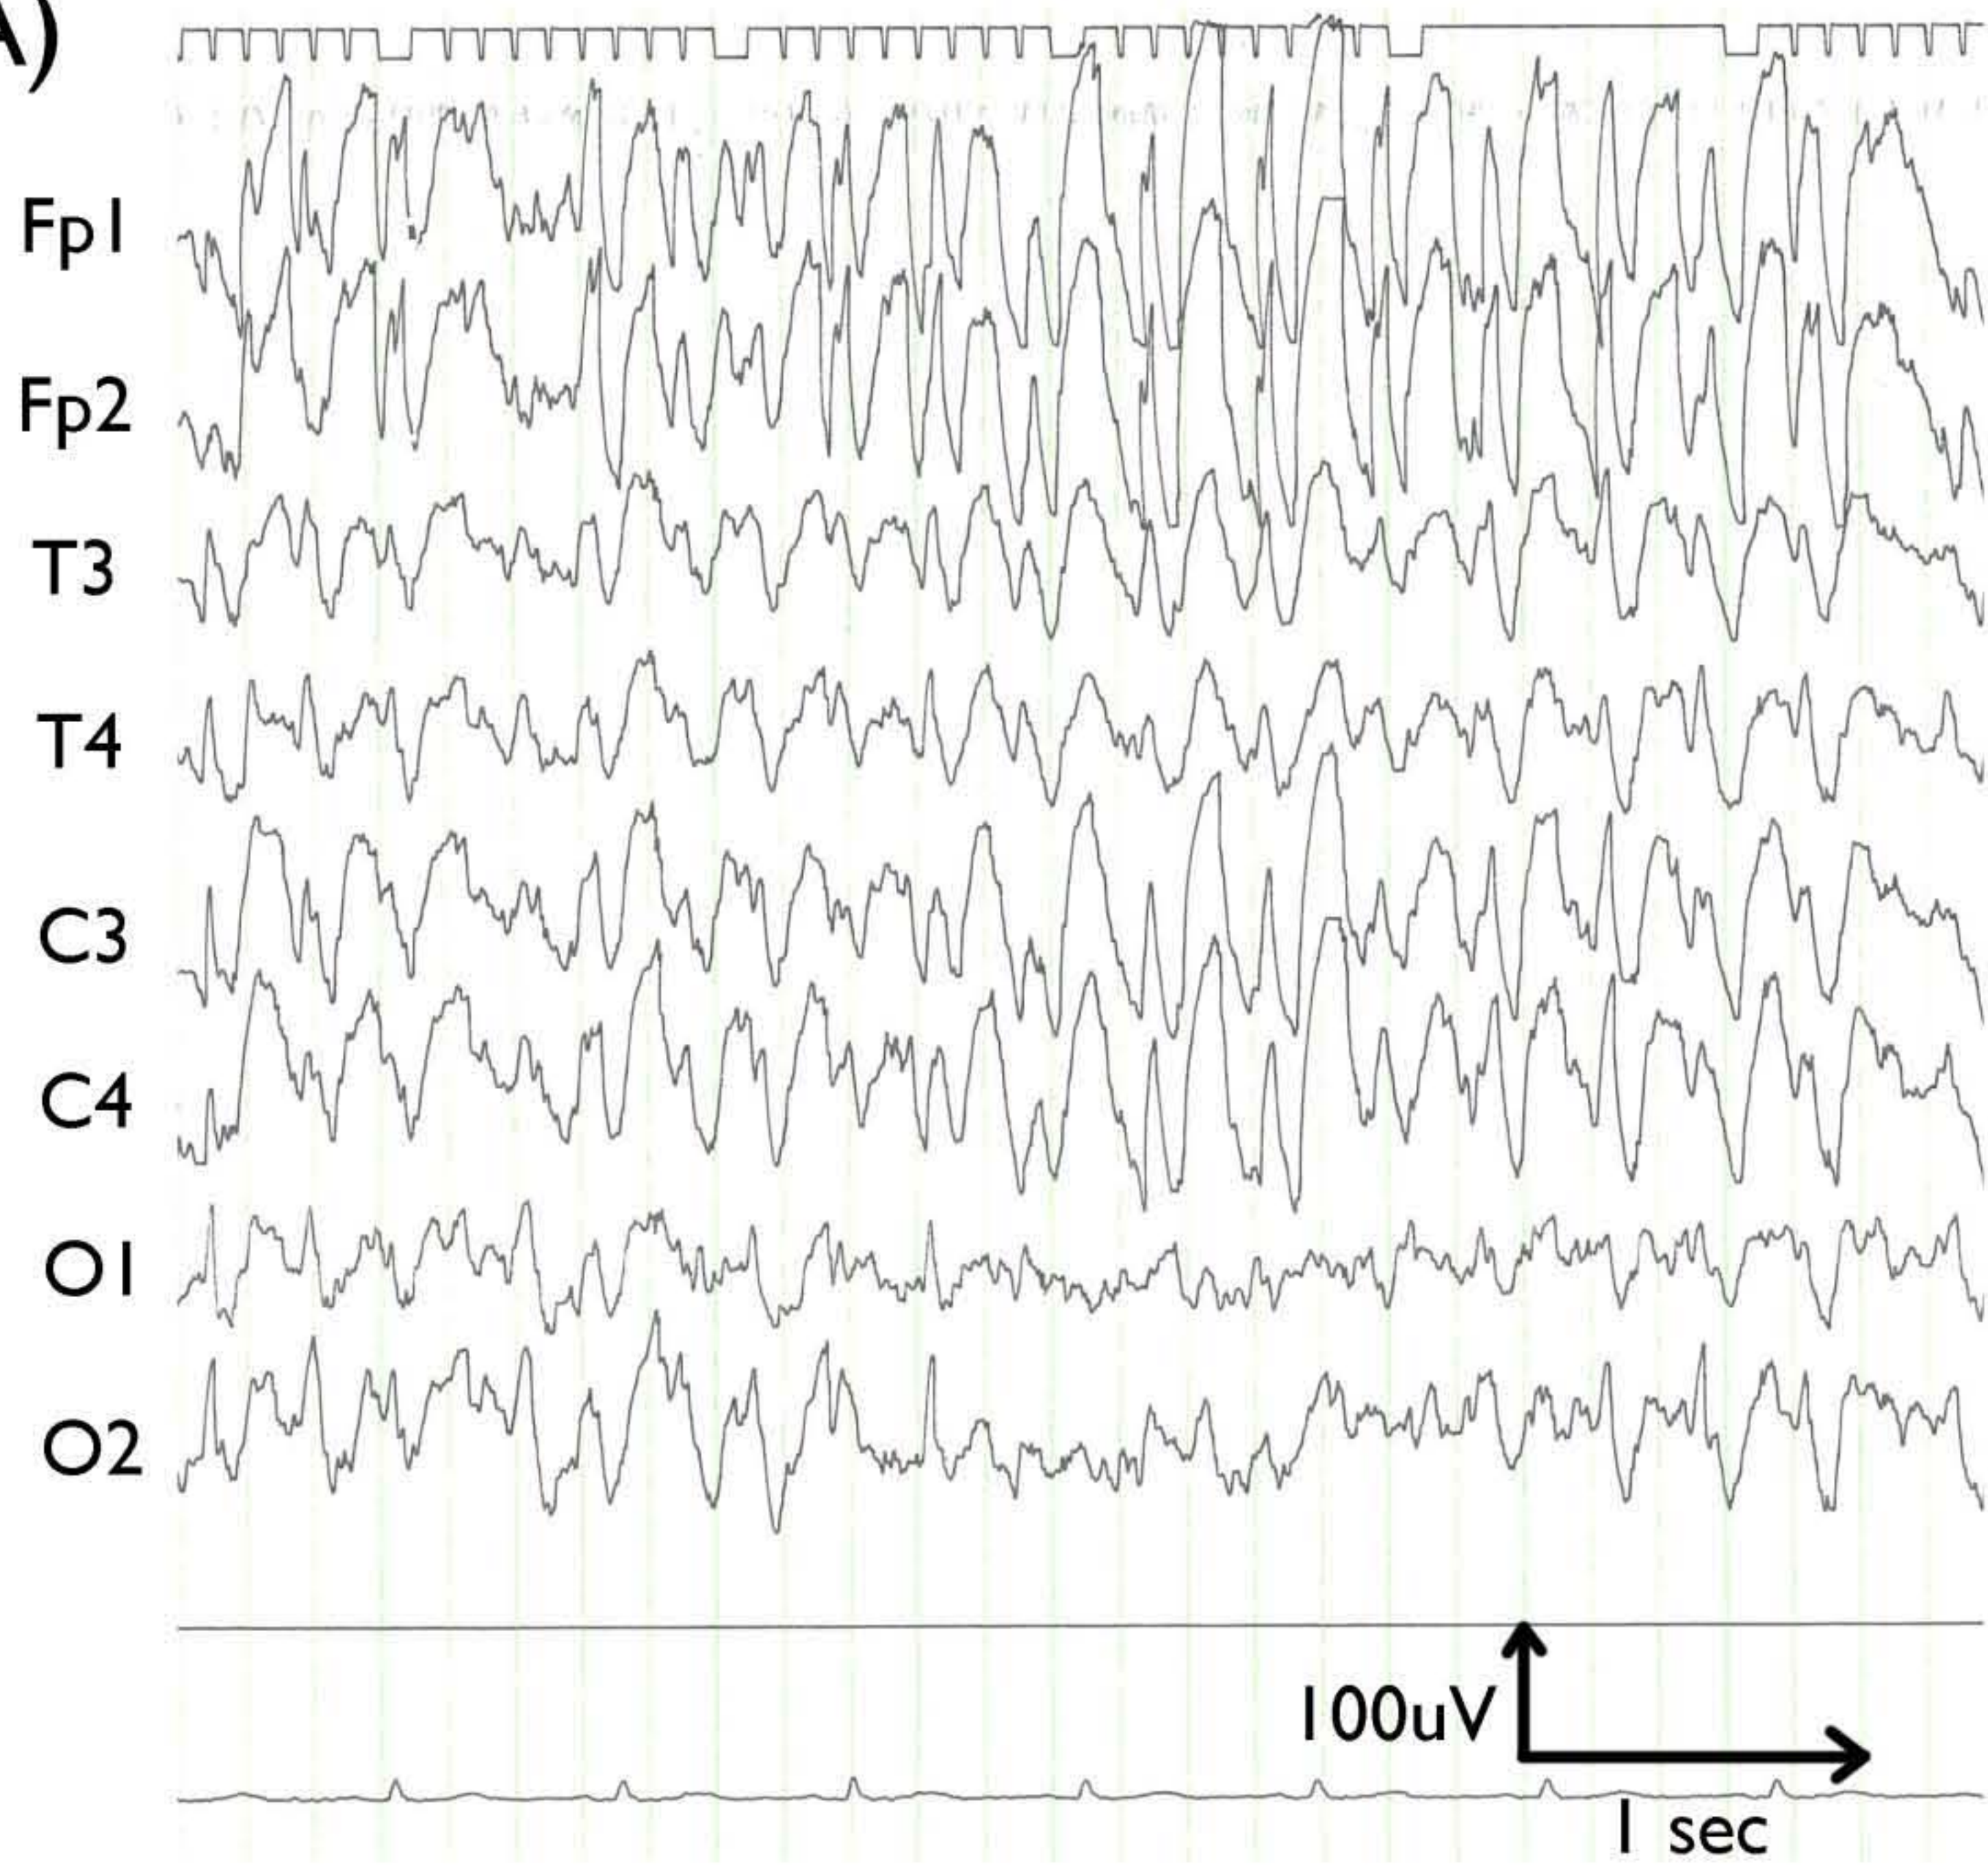

(B)

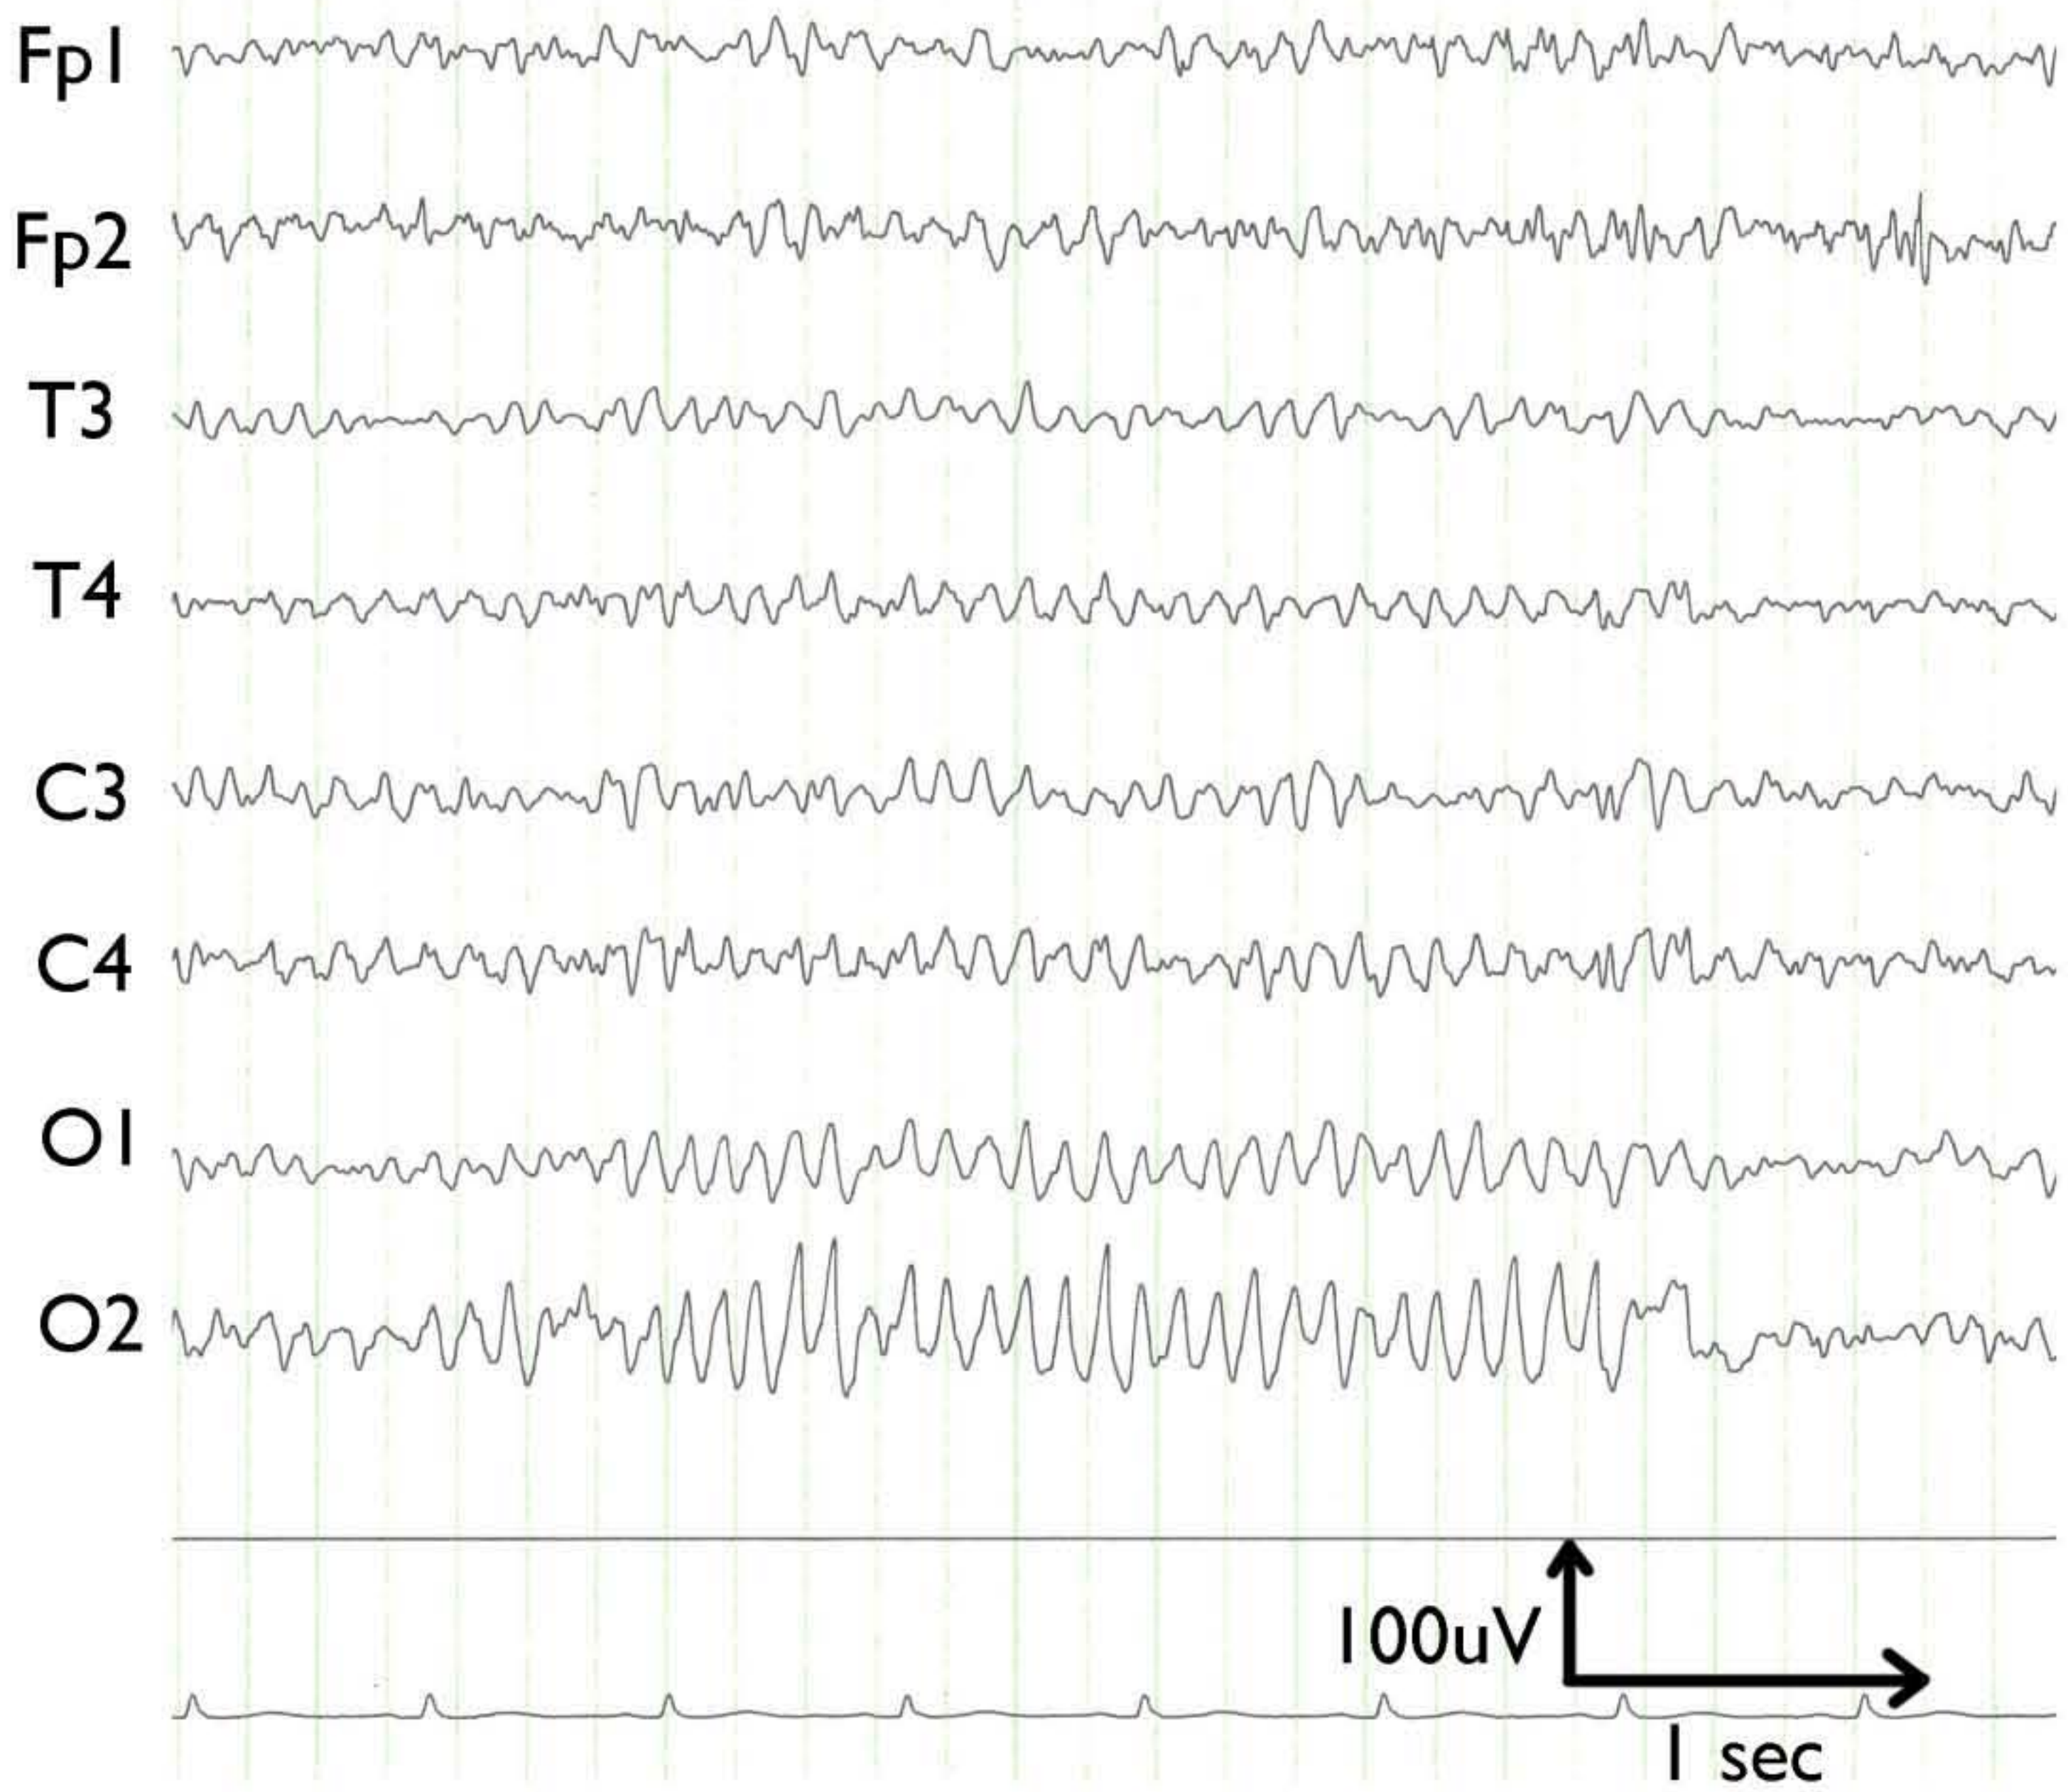

Supplement: MOESM1 [file 9648474]
